# Supplementary material for: A moisture-controlled Prussian white/CNT composite high energy cathode for next-generation sodium-ion batteries
Source: Royal Society of Chemistry journal article supplement (doi:10.1039/d3ta05171d), 2023-01-01
Supplement: d3ta05171d1.pdf [file d3ta05171d1.pdf]

## Supplementary Data

### **Moisture-controlled Prussian white/CNT composite high energy cathode for next-generation sodium-ion batteries**

Jun Lee<sup>†</sup>, Wangchae Jeong<sup>†</sup>, Jaeryeol Baek<sup>†</sup>, Yeongmin Kim, Yuri Choi, Vinod Mathew, Balaji Sambandam, Muhammad Hilmy Alfaruqi and Jaekook Kim<sup>\*</sup>

*Department of Materials Science and Engineering, Chonnam National University, Gwangju 61186, South Korea.*

<sup>†</sup>These authors contributed equally

<sup>\*</sup>Corresponding author. Tel: +82-62-530-1703. Fax: +82-62-530-1699.

E-mail: [jaekook@chonnam.ac.kr](mailto:jaekook@chonnam.ac.kr) (Jaekook Kim)

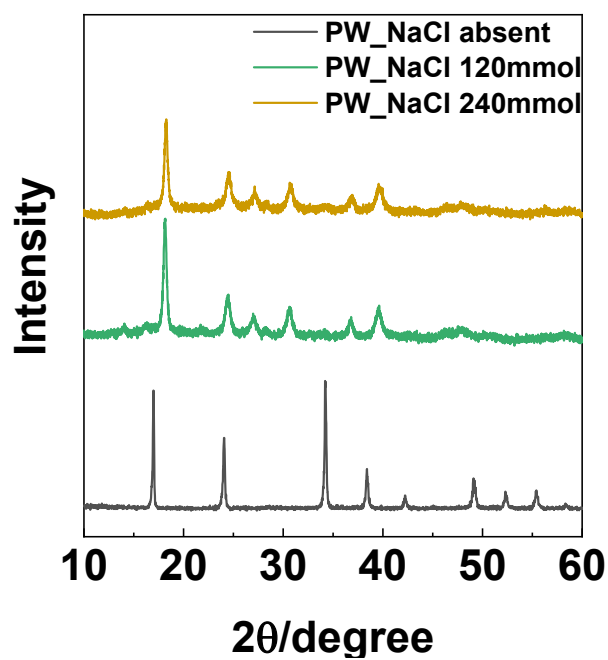

**Fig. S1.** XRD profile for PW samples with varying NaCl concentration, where other salts concentration are kept constant.

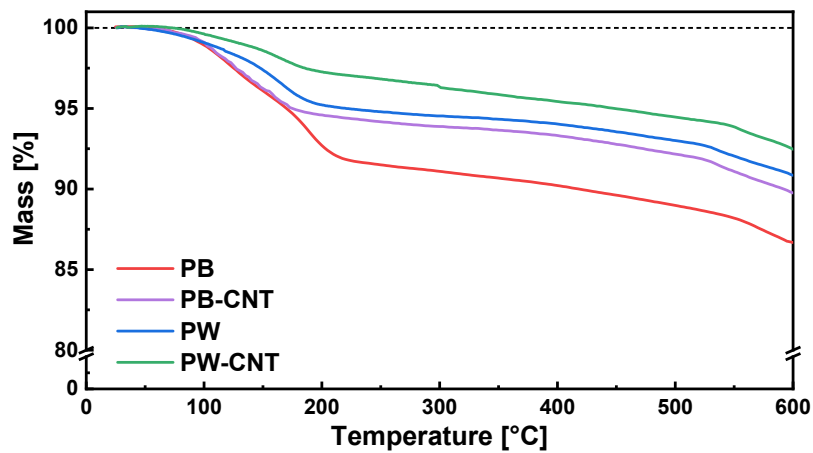

**Fig. S2.** Thermogravimetric plots obtained for PB, PB-CNT, PW and PW-CNT cathodes

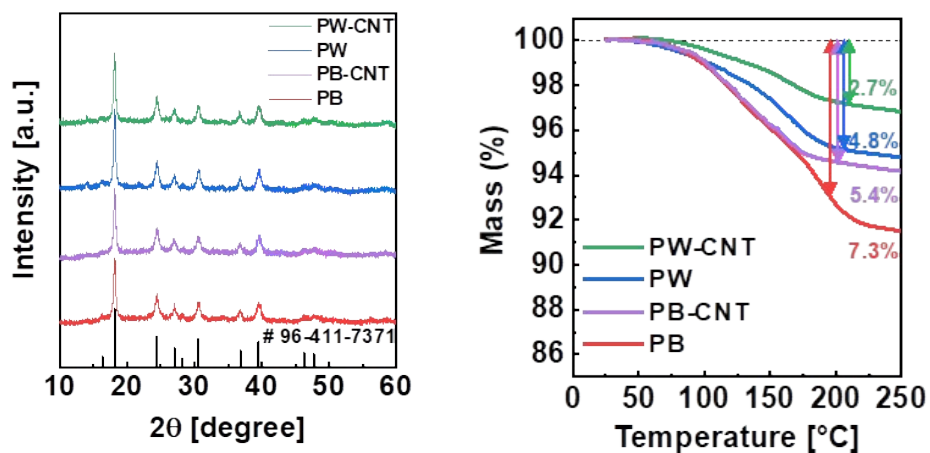

**Fig. S3.** (a) XRD comparison PB-CNT with other samples, and (b) Comparative TG plots of PB-CNT, PB, PW and PW-CNT samples (low temperature range from room temperature to 250 °C).

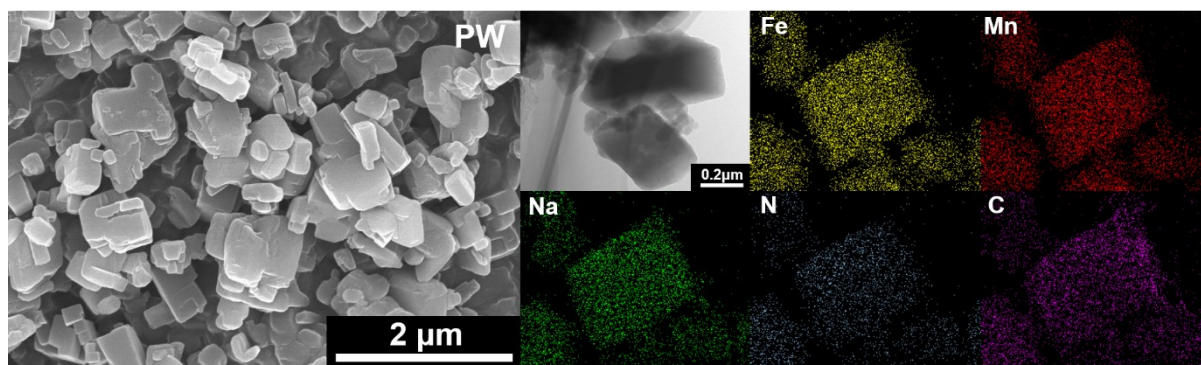

**Fig. S4.** SEM and elemental mapping images recorded for the PW cathode prepared by the co-precipitation technique.

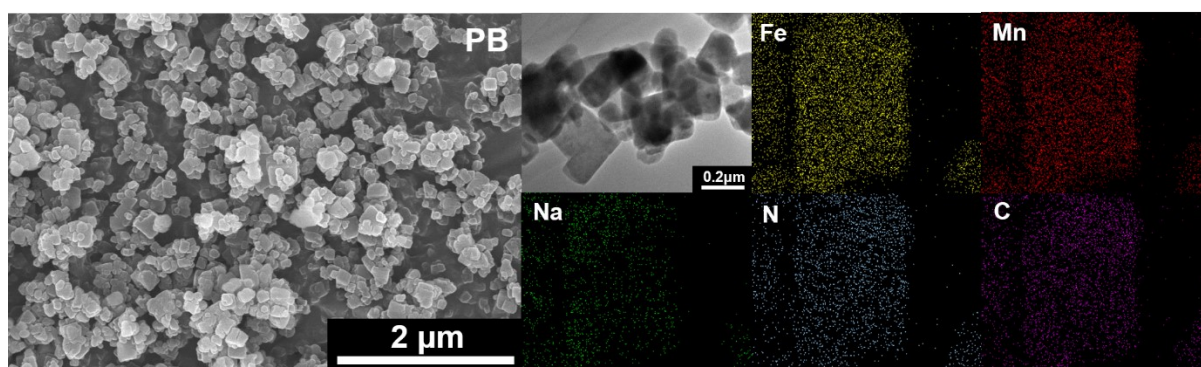

**Fig. S5.** SEM and elemental mapping images recorded for the PB cathode prepared by the co-precipitation technique.

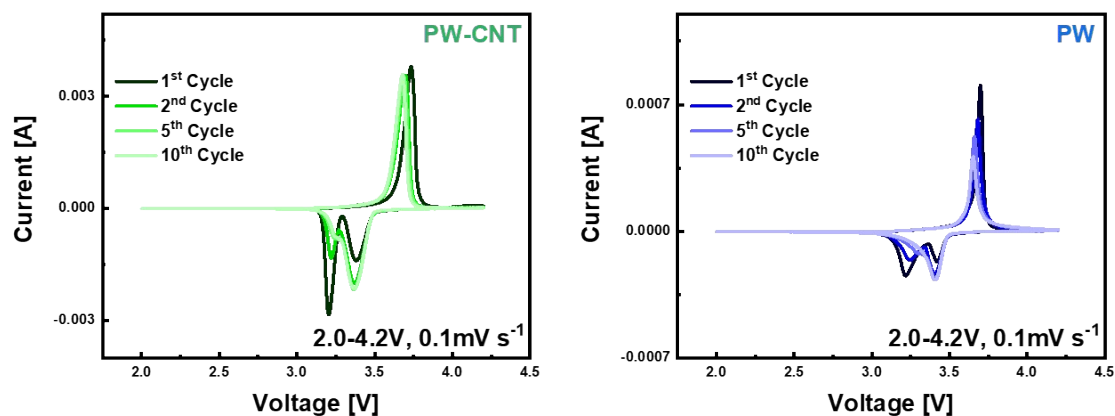

**Fig. S6.** (a) Cyclic voltammetry curves for the PW-CNT and PW cathodes.

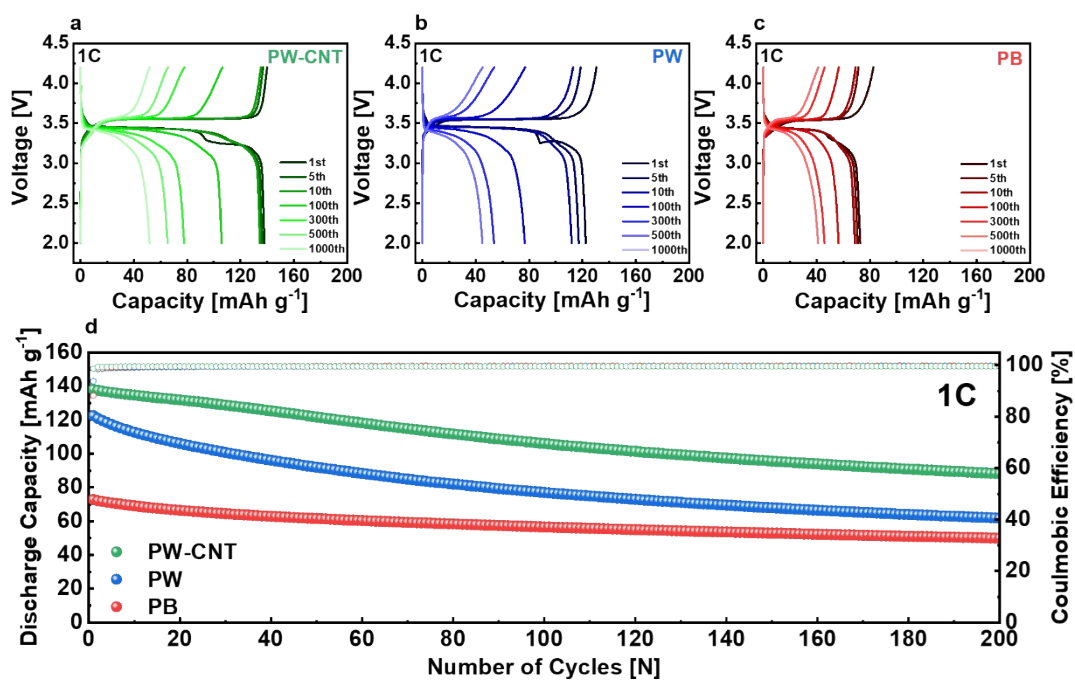

**Fig. S7.** Selected charge-discharge profiles of the (a) PW-CNT (b) PW and (c) PB cathodes with their (d) cycle-life profiles at 1 C.

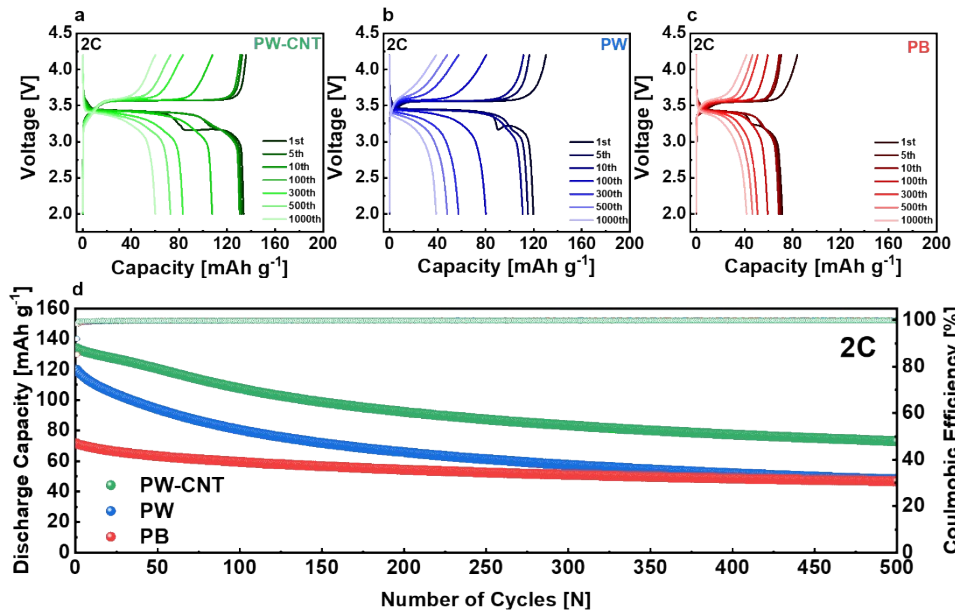

**Fig. S8.** Selected charge-discharge profiles of the (a) PW-CNT (b) PW and (c) PB cathodes with their (d) cycle-life profiles at 2 C.

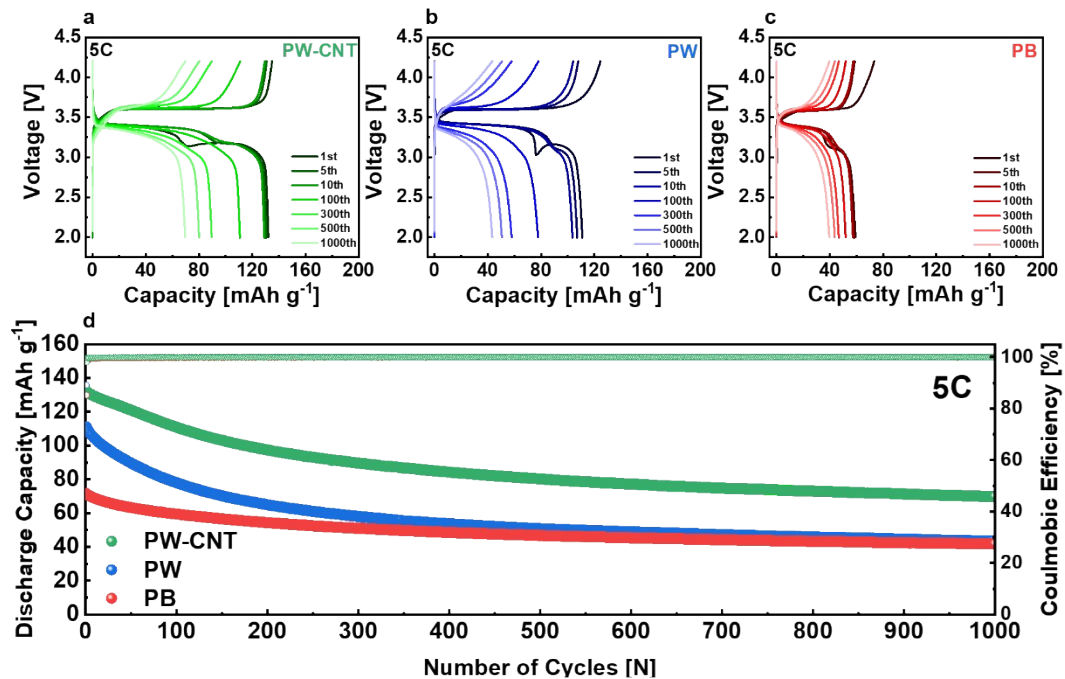

**Fig. S9.** Selected charge-discharge profiles of the (a) PW-CNT (b) PW and (c) PB cathodes with their (d) cycle-life profiles at 5 C.

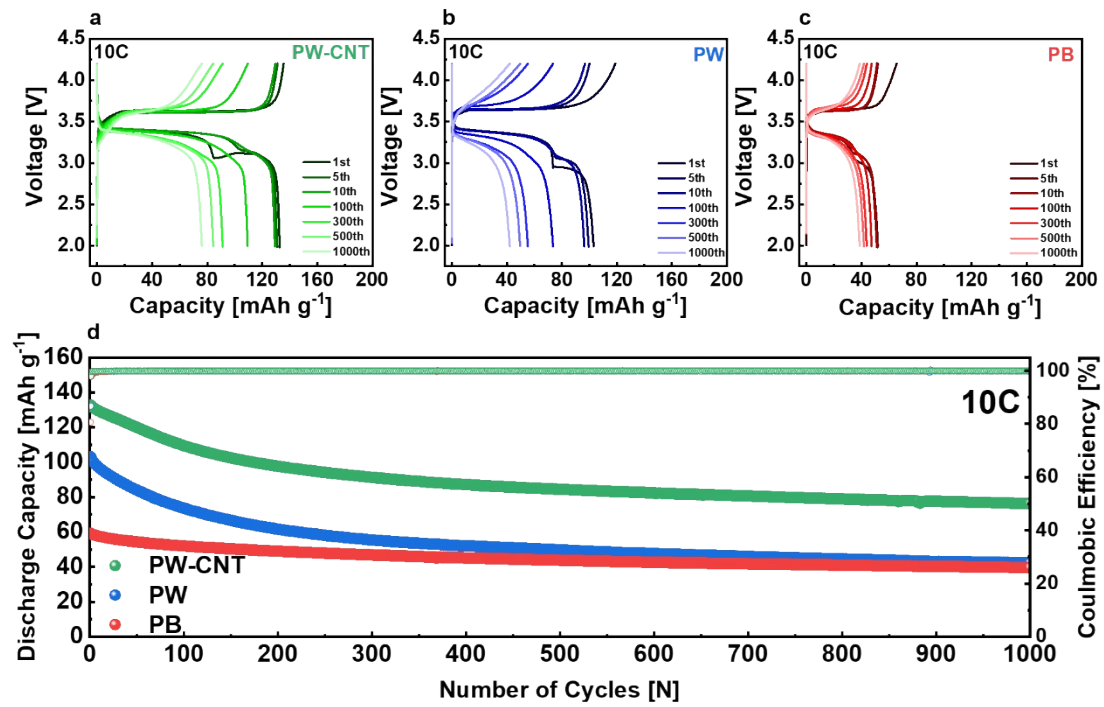

**Fig. S10.** Selected charge-discharge profiles of the (a) PW-CNT (b) PW and (c) PB cathodes with their (d) cycle-life profiles at 10 C.

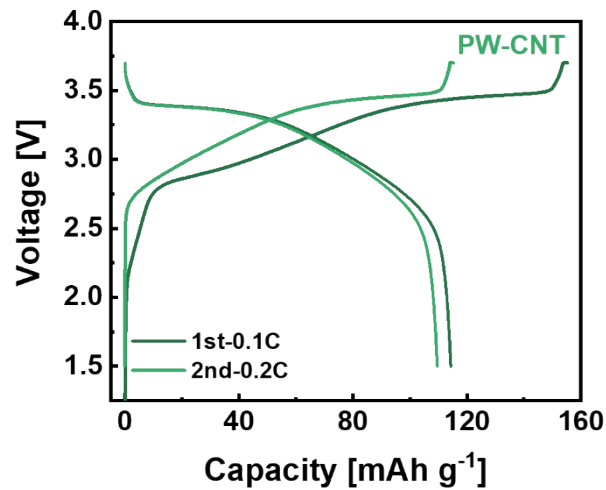

**Fig. S11.** Initial two electrochemical profiles of the full cell with the prepared PW-CNT cathode at 0.1 and 0.2 C rates, respectively to realize electrode activation.

**Table S1.** ICP results for the prepared samples by the co-precipitation method. Fe is used as the reference element here.

| <b>Sample Name</b> | <b>Na</b> | <b>Mn</b> | <b>Fe</b> |
|--------------------|-----------|-----------|-----------|
| <b>PB</b>          | 0.94      | 1.17      | 1.00      |
| <b>PW</b>          | 1.92      | 0.95      | 1.00      |
| <b>PW-CNT</b>      | 2.00      | 0.988     | 1.00      |

**Table S2.** Comparative electrochemical performances of PBA-based cathodes in literature with that of the present PW-CNT cathode synthesized by the chelating-agent-assisted co-precipitation method.

| Materials                                                                                                                                             | Voltage range (V)                         | Best Capacity [mAh g <sup>-1</sup> ] | Best rate capability [mAh g <sup>-1</sup> ] | Best cycling                                     | Full Cell | Anode                                                   | Best cycling                                     | Ref       |
|-------------------------------------------------------------------------------------------------------------------------------------------------------|-------------------------------------------|--------------------------------------|---------------------------------------------|--------------------------------------------------|-----------|---------------------------------------------------------|--------------------------------------------------|-----------|
| Na <sub>2</sub> MnFe(CN) <sub>6</sub> -CNT                                                                                                            | 2.0 – 4.2                                 | 140.9 at 0.1C                        | 110.4 at 30 C                               | 57% after 1000 cycles at 10C                     | O         | Hard carbon                                             | 58% after 1500 cycles at 1C                      | This work |
| NaK-MnHCF@3DNC<br>Na <sub>1.73</sub> K <sub>0.13</sub> Mn[Fe(CN) <sub>6</sub> ] <sub>0.977</sub> · □ <sub>0.03</sub>                                  | 2.0 – 4.2                                 | 220 at 20 mA g <sup>-1</sup>         | 110 at 500 mA g <sup>-1</sup>               | 85% after 500 cycles at 100 mA g <sup>-1</sup>   | O         | Hard carbon, 1.0-4.2V, 40mA g <sup>-1</sup>             |                                                  | [1]       |
| C-MnHCF<br>Na <sub>1.38</sub> Mn[Fe(CN) <sub>6</sub> ] <sub>0.92</sub> □ <sub>0.08</sub> · 2.57 H <sub>2</sub> O                                      | 2.0 – 4.2                                 | 115 at 25 mA g <sup>-1</sup>         | 755/113 3.8 at 600m A g <sup>-1</sup>       | 70% after 500 cycles at 200 mA g <sup>-1</sup>   | O         | TiO <sub>2</sub> anode, pre- sodiation                  | 52.7% after 100 cycles at 200 mA g <sup>-1</sup> | [2]       |
| NaMHCF-14-170°C<br>Na <sub>1.94</sub> Mn[Fe <sub>0.99</sub> (CN) <sub>6</sub> ] <sub>0.95</sub> · □ <sub>0.05</sub> · 1.92 H <sub>2</sub> O           | 2.0 – 4.2                                 | 168.8 at 10 mA g <sup>-1</sup>       | 126.6 at 2000 mA g <sup>-1</sup>            | 87.6% after 100 cycles at 100 mA g <sup>-1</sup> | O         | NaTi <sub>2</sub> (PO <sub>4</sub> ) <sub>3</sub> (NTP) | 84% after 500 cycles at 100 mA g <sup>-1</sup>   | [3]       |
| Na <sub>1.80</sub> Mn[Fe(CN) <sub>6</sub> ] <sub>0.98</sub> □ <sub>0.02</sub> · 1.76 H <sub>2</sub> O                                                 | 2.0 – 4.0<br>1C=150m A g <sup>-1</sup>    | 144.0 at 0.1C                        | 86.6 at 10C                                 | 72.7% after 2100 cycles at 1 C                   | X         | -                                                       | -                                                | [4]       |
| H-PBM<br>Na <sub>1.92</sub> Mn[Fe(CN) <sub>6</sub> ] <sub>0.98</sub> · 1.38 H <sub>2</sub> O                                                          | 2.0 – 4.0<br>1C=100m A g <sup>-1</sup>    | 152.8 at 0.1C                        | 110.3 at 10C                                | 82% after 500 cycles at 1C                       | X         | -                                                       | -                                                | [5]       |
| HQ-MnCoNi-PB<br>Na <sub>1.59</sub> Mn <sub>0.17</sub> Co <sub>0.18</sub> Ni <sub>0.04</sub> Fe <sub>0.61</sub> [Fe(CN) <sub>6</sub> ] <sub>0.92</sub> | 2.0 – 4.0<br>(1C=170 mA g <sup>-1</sup> ) | 117 at 0.1C                          | 70 at 9C                                    | 78.7% after 1500 cycles at 1C                    | X         | -                                                       | -                                                | [6]       |
| MnHCF@PEDOT<br>Na <sub>1.71</sub> Mn[Fe(CN) <sub>6</sub> ] <sub>0.94</sub> · 1.66 H <sub>2</sub> O                                                    | 2.0 – 4.0<br>1C=150m A g <sup>-1</sup>    | 147.9 at 0.1C                        | 90.1 at 20C                                 | 78.2% after 1000 cycles at 1C                    | X         | -                                                       | -                                                | [7]       |
| Na <sub>1.20</sub> Mn[Fe(CN) <sub>6</sub> ] <sub>0.79</sub> · 2.64H <sub>2</sub> O                                                                    | 2.0 – 4.2<br>1C=150m A g <sup>-1</sup>    | 162.4 at 0.1C                        | 109.2 at 5C                                 | 76% after 100 cycles at 1C                       | X         | -                                                       | -                                                | [8]       |



## References for Table S2

1. Y. Mao, Y. Chen, J. Qin, C. Shi, E. Liu and N. Zhao, *Nano Energy*, 2019, **58**, 192-201.
2. Y. Tang, W. Li, P. Feng, M. Zhou, K. Wang, Y. Wang, K. Zaghbi and K. Jiang, *Advanced Functional Materials*, 2020, **30**.
3. S. He, J. Zhao, X. Rong, C. Xu, Q. Zhang, X. Shen, X. Qi, Y. Li, X. Li, Y. Niu, X. Li, S. Han, L. Gu, H. Liu and Y.-S. Hu, *Chemical Engineering Journal*, 2022, **428**.
4. Z. Shen, S. Guo, C. Liu, Y. Sun, Z. Chen, J. Tu, S. Liu, J. Cheng, J. Xie, G. Cao and X. Zhao, *ACS Sustainable Chemistry & Engineering*, 2018, **6**, 16121-16129.
5. F. Peng, L. Yu, P. Gao, X.-Z. Liao, J. Wen, Y.-s. He, G. Tan, Y. Ren and Z.-F. Ma, *Journal of Materials Chemistry A*, 2019, **7**, 22248-22256.
6. B. Xie, P. Zuo, L. Wang, J. Wang, H. Huo, M. He, J. Shu, H. Li, S. Lou and G. Yin, *Nano Energy*, 2019, **61**, 201-210.
7. X. Wang, B. Wang, Y. Tang, B. B. Xu, C. Liang, M. Yan and Y. Jiang, *Journal of Materials Chemistry A*, 2020, **8**, 3222-3227.
8. Y. Xi and Y. Lu, *Chemical Engineering Journal*, 2021, **405**.
